# Supplementary material
Source: Springer Nature journal article supplement (https://www.springermedizin.de/resource/supplementary/12943_2009_687_MOESM4_ESM.pdf/9554582)

**A**

-522 CGCTGCGGGG CGGGGGCTCT CGGGCTGGGG CGACGTGGCC AGCCCAGTCC TGCCGAGGGG TGGGGCTGCG CCTGGGGCTC<sub>8</sub>  
 1 2 3 4 5 6 7 8 9 10 11 12 13 14 15 16 17 18 19 20 Spl-B  
 -442 GCTGGCCCGG CGCCGCCGCG GAGAGAGCGC GCCCGGGCCA CCCCGGCTGG AAGGCATCCC CGGAATGCGG CGGCTCAGCA  
Spl-B 9 10 11 12 13 14 15 16 Spl-C 17 18 19 20  
 -362 CCCCCCCCCT CGGGAATTC CCGGGGGAGC CGCTGGGAGG GACTCGGCTC CCGGGCTGGG CCGGCCGGGC CTCGGGCTCT  
 21 22 23 24 25 26 27 28 Spl-D 29  
 -282 GAGCGGTGGG ATTAGAGGCT CCAGCCCCGC CGACTTGCG ACGTGAGATC GGGCACACCT GAGCGGGCCG GGGGCCCTCG  
 30 31 32 33 34 35 36 37 38 39  
 -202 TGGCCACATC CGGGGCGGACG TGCGTAGTCT ACCCCGTCCC GCCAGCGTCT GCCAGTCCAG CCAGTCCGCC CAGTCTCTCG<sub>47</sub>  
 40 41 42 43 44 45 46 47  
 -122 CGTCCGAGAC TGGCTCCAG CCTCCCACCT CCGCCCGGGC CGCGCGAGCC TCCGGGGGCC GGGGCCGGG CGCCAGGGG  
 48 Spl-F49 50 51 52 53 54 55 56 57 58 59 60 Spl-F  
 -42 CGGGGCTGTC TCTTAAAGGG CCCCGGGCGG CTGCCCTTAG GCCACTTCT GGGGCGGAG AGGACCTCAG CGGCTGCGGC  
 61 62 63 64 65 66 67  
 +38 GACACCCAGG GAAGGCGGGC CGGCGGGGTC CCGAAACTCC TGGTGTTTC CATCAGAGCC CTC

**B**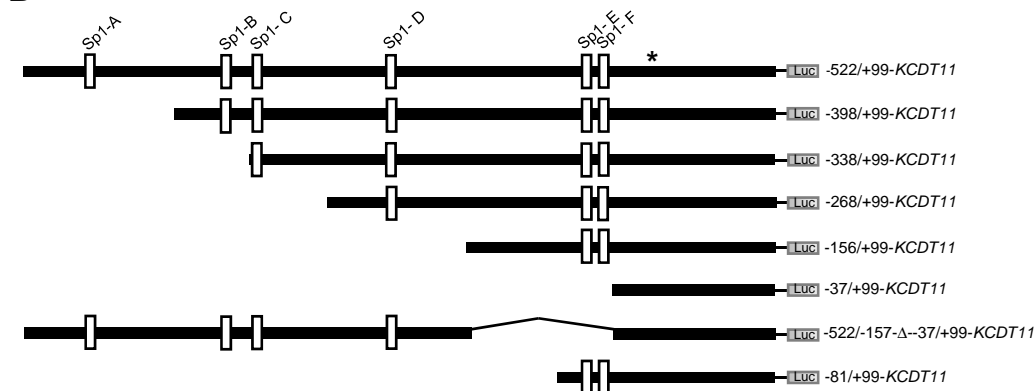**C**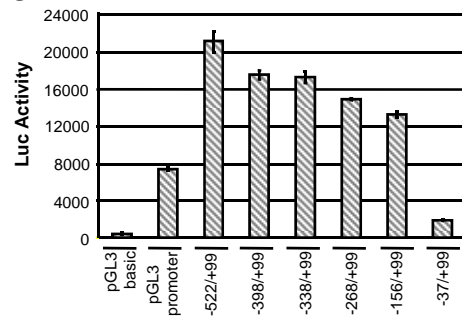**D**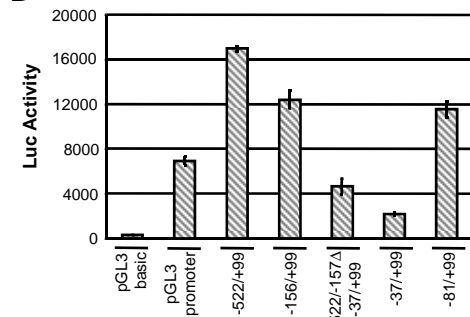

Supplement: MOESM4 [file 9554582]
